# Supplementary material for: An update on the performance of STI services for gay and bisexual men across European cities: results from the 2017 European MSM Internet Survey
Source: HighWire-hosted journal article supplement (doi:10.1136/sextrans-2020-054681), 2020-11-03
Supplement: sextrans-2020-054681supp001_data_supplement.pdf [file sextrans-2020-054681supp001_data_supplement.pdf]

## Online Supplement. An update on the performance of STI services for gay and bisexual men across European cities—results from the 2017 European MSM Internet Survey

1/4

**Table S1:** City profiles and individual-level multivariable logistic regression (105 cities across 39 countries)

| City<br>(By Country)  | Respondents<br>N | Age      |          | Diagnosed<br>HIV<br>% | Current<br>PrEP use <sup>†</sup><br>% | >10 Sexual<br>partners<br>% | Screened<br>for STIs<br>% | Disclosure of same-sex<br>sexual contacts |      | Blood Test       | Genital Test |                  | Inspection |                  | Anal Swab |                  |  |
|-----------------------|------------------|----------|----------|-----------------------|---------------------------------------|-----------------------------|---------------------------|-------------------------------------------|------|------------------|--------------|------------------|------------|------------------|-----------|------------------|--|
|                       |                  | <25<br>% | >40<br>% |                       |                                       |                             |                           | %                                         | %    | AOR (95% CI)     | %            | AOR (95% CI)     | %          | AOR (95% CI)     | %         | AOR (95% CI)     |  |
| <b>Austria</b>        |                  |          |          |                       |                                       |                             |                           |                                           |      |                  |              |                  |            |                  |           |                  |  |
| Vienna                | 1,120            | 15.1     | 35.0     | 10.1                  | 3.4                                   | 31.7                        | 38.5                      | 79.6                                      | 94.2 | 0.46 (0.39–0.54) | 58.9         | 0.23 (0.19–0.27) | 16.4       | 0.76 (0.60–0.97) | 30.4      | 0.15 (0.12–0.18) |  |
| <b>Belarus</b>        |                  |          |          |                       |                                       |                             |                           |                                           |      |                  |              |                  |            |                  |           |                  |  |
| Minsk                 | 244              | 32.4     | 10.7     | 6.2                   | 0.4                                   | 20.9                        | 37.2                      | 18.7                                      | 91.0 | 0.58 (0.44–0.78) | 68.5         | 0.38 (0.29–0.51) | 11.2       | 0.57 (0.32–0.99) | 19.1      | 0.09 (0.06–0.14) |  |
| <b>Belgium</b>        |                  |          |          |                       |                                       |                             |                           |                                           |      |                  |              |                  |            |                  |           |                  |  |
| Antwerp               | 206              | 3.9      | 55.3     | 26.0                  | 10.8                                  | 44.2                        | 59.7                      | 91.2                                      | 99.2 | 1.24 (0.87–1.77) | 70.8         | 0.45 (0.33–0.63) | 11.7       | 0.53 (0.32–0.88) | 29.2      | 0.13 (0.09–0.19) |  |
| Brussels              | 724              | 7.6      | 46.3     | 14.5                  | 7.6                                   | 47.8                        | 55.1                      | 76.8                                      | 96.7 | 0.79 (0.66–0.96) | 68.5         | 0.36 (0.30–0.44) | 8.7        | 0.36 (0.26–0.50) | 36.7      | 0.19 (0.15–0.23) |  |
| <b>Bulgaria</b>       |                  |          |          |                       |                                       |                             |                           |                                           |      |                  |              |                  |            |                  |           |                  |  |
| Sofia                 | 629              | 21.9     | 15.4     | 7.8                   | 1                                     | 24.8                        | 31.5                      | 25.3                                      | 90.1 | 0.38 (0.31–0.46) | 38.0         | 0.14 (0.11–0.17) | 7.8        | 0.37 (0.24–0.55) | 6.8       | 0.03 (0.02–0.05) |  |
| <b>Canada</b>         |                  |          |          |                       |                                       |                             |                           |                                           |      |                  |              |                  |            |                  |           |                  |  |
| Calgary               | 288              | 15.3     | 38.9     | 9.5                   | 5.3                                   | 32.3                        | 60.0                      | 87.0                                      | 97.1 | 1.34 (1.01–1.77) | 95.3         | 1.24 (0.94–1.63) | 40.9       | 3.21 (2.40–4.29) | 62.6      | 0.72 (0.55–0.95) |  |
| Edmonton              | 251              | 19.9     | 31.5     | 5.2                   | 5.2                                   | 23.9                        | 55.6                      | 77.0                                      | 98.6 | 1.34 (1.00–1.79) | 94.9         | 1.14 (0.86–1.52) | 26.1       | 2.15 (1.53–3.02) | 42.8      | 0.41 (0.30–0.56) |  |
| Montreal              | 485              | 16.3     | 36.5     | 10.8                  | 18.2                                  | 36.5                        | 62.3                      | 91.8                                      | 95.6 | 1.05 (0.83–1.32) | 95.3         | 1.02 (0.82–1.29) | 41.6       | 2.79 (2.20–3.53) | 68.6      | 0.64 (0.51–0.79) |  |
| Ottawa-Gatineau       | 258              | 14.7     | 44.2     | 8.6                   | 11.3                                  | 34.9                        | 50.8                      | 92.9                                      | 93.8 | 0.78 (0.59–1.04) | 86.8         | 0.65 (0.49–0.86) | 25.6       | 1.40 (0.97–2.01) | 44.2      | 0.27 (0.20–0.37) |  |
| Toronto               | 849              | 11.7     | 47.8     | 13.0                  | 13.3                                  | 39.0                        | 55.4                      | 90.2                                      | 96.3 | 0.90 (0.75–1.08) | 90.6         | 0.77 (0.65–0.92) | 22.2       | 1.14 (0.91–1.43) | 39.9      | 0.22 (0.18–0.26) |  |
| Vancouver             | 876              | 10.5     | 42.9     | 14.0                  | 9.1                                   | 34.1                        | 63.8                      | 88.9                                      | 96.7 | 1.41 (1.18–1.69) | 94.1         | 1.27 (1.06–1.52) | 19.2       | 1.13 (0.90–1.42) | 57.6      | 0.59 (0.50–0.71) |  |
| Winnipeg              | 133              | 5.2      | 49.6     | 9.8                   | 5.3                                   | 25.8                        | 43.8                      | 94.2                                      | 100  | 0.75 (0.51–1.10) | 94.7         | 0.66 (0.45–0.96) | 43.9       | 2.25 (1.43–3.52) | 61.4      | 0.43 (0.29–0.66) |  |
| <b>Croatia</b>        |                  |          |          |                       |                                       |                             |                           |                                           |      |                  |              |                  |            |                  |           |                  |  |
| Zagreb                | 432              | 34.0     | 17.8     | 6.5                   | 0.0                                   | 14.8                        | 36.8                      | 59.7                                      | 83.3 | 0.50 (0.39–0.62) | 42.3         | 0.19 (0.15–0.25) | 7.1        | 0.43 (0.26–0.71) | 19.9      | 0.13 (0.10–0.19) |  |
| <b>Cyprus</b>         |                  |          |          |                       |                                       |                             |                           |                                           |      |                  |              |                  |            |                  |           |                  |  |
| Nicosia               | 107              | 13.1     | 34.6     | 17.8                  | 0.9                                   | 35.5                        | 42.2                      | 46.3                                      | 93.0 | 0.51 (0.33–0.79) | 27.9         | 0.10 (0.06–0.17) | 14.0       | 0.42 (0.18–0.98) | 14.0      | 0.07 (0.03–0.14) |  |
| <b>Czech Republic</b> |                  |          |          |                       |                                       |                             |                           |                                           |      |                  |              |                  |            |                  |           |                  |  |
| Prague                | 807              | 18.1     | 21.9     | 10.9                  | 0.5                                   | 25.4                        | 39.2                      | 83.0                                      | 98.4 | 0.53 (0.44–0.63) | 59.9         | 0.24 (0.20–0.29) | 12.2       | 0.58 (0.43–0.79) | 28.0      | 0.16 (0.13–0.20) |  |
| <b>Denmark</b>        |                  |          |          |                       |                                       |                             |                           |                                           |      |                  |              |                  |            |                  |           |                  |  |
| Copenhagen            | 689              | 9.9      | 48.2     | 17.1                  | 3.8                                   | 38.2                        | 42.9                      | 88.5                                      | 96.2 | 0.60 (0.50–0.72) | 69.4         | 0.37 (0.31–0.45) | 24.3       | 1.41 (1.11–1.78) | 54.9      | 0.42 (0.35–0.51) |  |
| <b>Estonia</b>        |                  |          |          |                       |                                       |                             |                           |                                           |      |                  |              |                  |            |                  |           |                  |  |
| Tallinn               | 126              | 16.7     | 29.4     | 4.0                   | 0.0                                   | 19.0                        | 32.2                      | 18.8                                      | 79.5 | 0.31 (0.21–0.47) | 74.4         | 0.27 (0.18–0.41) | 10.3       | 0.50 (0.22–1.14) | 15.4      | 0.06 (0.03–0.14) |  |
| <b>France</b>         |                  |          |          |                       |                                       |                             |                           |                                           |      |                  |              |                  |            |                  |           |                  |  |
| Bordeaux              | 311              | 21.5     | 36.3     | 9.0                   | 6.8                                   | 40.2                        | 47.2                      | 63.0                                      | 93.8 | 0.67 (0.51–0.87) | 58.3         | 0.28 (0.21–0.36) | 5.6        | 0.31 (0.18–0.54) | 31.9      | 0.14 (0.10–0.20) |  |
| Lille                 | 236              | 23.3     | 34.3     | 13.7                  | 9.4                                   | 47.9                        | 50.4                      | 72.5                                      | 94.8 | 0.73 (0.54–0.98) | 72.4         | 0.38 (0.28–0.51) | 20.7       | 1.12 (0.76–1.64) | 37.9      | 0.21 (0.15–0.29) |  |
| Lyon                  | 516              | 22.3     | 36.2     | 10.9                  | 9.0                                   | 51.7                        | 52.8                      | 73.9                                      | 95.9 | 0.85 (0.68–1.06) | 71.5         | 0.44 (0.35–0.54) | 13.5       | 0.80 (0.59–1.07) | 39.0      | 0.24 (0.19–0.30) |  |
| Marseille             | 221              | 19.0     | 47.5     | 15.9                  | 8.6                                   | 46.2                        | 52.6                      | 71.2                                      | 96.5 | 0.76 (0.55–1.03) | 73.5         | 0.40 (0.30–0.54) | 17.7       | 0.95 (0.63–1.44) | 56.6      | 0.41 (0.30–0.56) |  |
| Montpellier           | 202              | 20.3     | 37.6     | 9.5                   | 8.0                                   | 41.1                        | 54.4                      | 68.5                                      | 97.2 | 0.81 (0.58–1.12) | 74.5         | 0.44 (0.32–0.61) | 6.6        | 0.30 (0.15–0.59) | 27.4      | 0.14 (0.09–0.21) |  |
| Nantes                | 189              | 25.9     | 32.8     | 7.0                   | 8.6                                   | 47.6                        | 54.3                      | 63.9                                      | 91.0 | 0.74 (0.53–1.04) | 62.0         | 0.32 (0.23–0.45) | 10.0       | 0.48 (0.27–0.86) | 28.0      | 0.14 (0.09–0.21) |  |
| Nice                  | 193              | 8.8      | 53.9     | 17.8                  | 15.2                                  | 45.6                        | 55.0                      | 68.1                                      | 95.2 | 0.61 (0.43–0.85) | 55.8         | 0.20 (0.14–0.28) | 17.3       | 0.80 (0.51–1.25) | 32.7      | 0.14 (0.09–0.20) |  |
| Paris                 | 2,284            | 10.6     | 48.2     | 16.3                  | 11.3                                  | 52.6                        | 55.9                      | 69.8                                      | 95.6 | 0.77 (0.67–0.87) | 76.2         | 0.42 (0.37–0.48) | 11.6       | 0.48 (0.40–0.58) | 43.8      | 0.24 (0.21–0.27) |  |
| Strasbourg            | 179              | 21.2     | 39.1     | 14.0                  | 3.4                                   | 36.5                        | 56.5                      | 68.4                                      | 91.6 | 0.89 (0.63–1.26) | 68.4         | 0.48 (0.34–0.67) | 4.2        | 0.21 (0.08–0.51) | 12.6      | 0.07 (0.04–0.12) |  |
| Toulouse              | 285              | 17.9     | 41.4     | 11.1                  | 8.2                                   | 41.8                        | 54.8                      | 60.8                                      | 93.5 | 0.81 (0.61–1.06) | 66.7         | 0.37 (0.28–0.49) | 9.2        | 0.53 (0.34–0.84) | 30.7      | 0.17 (0.12–0.23) |  |
| <b>Finland</b>        |                  |          |          |                       |                                       |                             |                           |                                           |      |                  |              |                  |            |                  |           |                  |  |
| Helsinki              | 498              | 9.2      | 45.0     | 8.3                   | 0.8                                   | 29.5                        | 35.0                      | 67.5                                      | 94.1 | 0.41 (0.33–0.51) | 90.6         | 0.39 (0.31–0.48) | 32.4       | 1.54 (1.17–2.03) | 54.1      | 0.32 (0.25–0.4)  |  |

The denominator for proportions of MSM with disclosure of same sex sexual contacts, and for the proportions of MSM receiving any of the four diagnostic procedures is the number of MSM screened for STIs in the previous 12 months in the respective city. The adjusted Odds Ratio (AOR) refers to all MSM in the respective city. \*The Ruhr Region is a polycentric urban area in North Rhine-Westphalia and the largest urban area in Germany, including the cities of Dortmund, Essen, Duisburg, and Bochum; the Swiss cities Geneva and Lausanne were combined to allow the inclusion of another large Swiss metropolitan area in addition to Zurich; Sevilla & Málaga, two cities that do not form a continuous metropolitan area, were combined because the regional breakdown for Spain was not detailed enough to analyse them separately. †PrEP use includes daily and on-demand use.

Online Supplement to Doran J, *et al.* An update on the performance of STI services for gay and bisexual men across European cities—results from the 2017 European MSM Internet Survey. doi: 10.1136/sextrans-2020-054681

Correspondence: Dr Axel Jeremias Schmidt; Sigma Research, London School of Hygiene and Tropical Medicine; [axel.j.schmidt@emis-project.eu](mailto:axel.j.schmidt@emis-project.eu)

## Online Supplement. An update on the performance of STI services for gay and bisexual men across European cities—results from the 2017 European MSM Internet Survey

2/4

**Table S1 (continued):** City profiles and individual-level multivariable logistic regression (105 cities across 39 countries)

| City<br>(By Country) | Respondents<br>N | Age      |          | Diagnosed<br>HIV<br>% | Current<br>PrEP use <sup>†</sup><br>% | >10 Sexual<br>partners<br>% | Screened<br>for STIs<br>% | Disclosure of same-sex<br>sexual contacts |      | Blood Test<br>AOR (95% CI) | Genital Test<br>AOR (95% CI) |                  | Inspection<br>AOR (95% CI) |                  | Anal Swab<br>AOR (95% CI) |                  |
|----------------------|------------------|----------|----------|-----------------------|---------------------------------------|-----------------------------|---------------------------|-------------------------------------------|------|----------------------------|------------------------------|------------------|----------------------------|------------------|---------------------------|------------------|
|                      |                  | <25<br>% | >40<br>% |                       |                                       |                             |                           | %                                         | %    |                            | %                            | %                | %                          | %                |                           |                  |
| <b>Germany</b>       |                  |          |          |                       |                                       |                             |                           |                                           |      |                            |                              |                  |                            |                  |                           |                  |
| Berlin               | 3,190            | 8.3      | 45.8     | 19.7                  | 4.7                                   | 40.4                        | 45.5                      | 90.0                                      | 95.1 | 0.57 (0.51–0.65)           | 68.4                         | 0.31 (0.28–0.35) | 22.6                       | 1.07 (0.92–1.25) | 47.0                      | 0.27 (0.24–0.31) |
| Bremen               | 154              | 13.6     | 46.1     | 10.0                  | 3.3                                   | 26.1                        | 32.9                      | 83.3                                      | 95.7 | 0.31 (0.21–0.45)           | 48.9                         | 0.12 (0.08–0.19) | 17.0                       | 0.52 (0.26–1.05) | 42.6                      | 0.16 (0.10–0.26) |
| Cologne              | 848              | 10.4     | 47.8     | 17.6                  | 3.4                                   | 35.7                        | 43.7                      | 87.2                                      | 93.6 | 0.53 (0.45–0.64)           | 55.7                         | 0.23 (0.19–0.27) | 12.9                       | 0.53 (0.40–0.71) | 24.9                      | 0.12 (0.10–0.16) |
| Dresden              | 234              | 17.5     | 31.2     | 6.9                   | 2.2                                   | 25.6                        | 30.9                      | 85.1                                      | 97.2 | 0.40 (0.30–0.54)           | 69.0                         | 0.23 (0.17–0.32) | 16.9                       | 0.61 (0.36–1.04) | 53.5                      | 0.26 (0.19–0.37) |
| Düsseldorf           | 278              | 12.2     | 48.2     | 11.6                  | 1.1                                   | 33.1                        | 36.8                      | 89.7                                      | 93.9 | 0.38 (0.29–0.50)           | 52.5                         | 0.15 (0.11–0.20) | 15.2                       | 0.60 (0.37–0.96) | 31.3                      | 0.15 (0.11–0.22) |
| Frankfurt            | 491              | 6.5      | 48.7     | 17.8                  | 3.7                                   | 36.9                        | 39.2                      | 82.1                                      | 92.8 | 0.36 (0.29–0.45)           | 67.8                         | 0.23 (0.18–0.28) | 13.9                       | 0.47 (0.32–0.69) | 16.1                      | 0.06 (0.04–0.08) |
| Hanover              | 232              | 10.8     | 46.6     | 6.1                   | 1.3                                   | 20.7                        | 29.9                      | 86.4                                      | 90.9 | 0.36 (0.27–0.49)           | 53.0                         | 0.17 (0.12–0.24) | 16.7                       | 0.78 (0.46–1.30) | 30.3                      | 0.16 (0.10–0.24) |
| Leipzig              | 308              | 17.2     | 30.8     | 10.8                  | 0.7                                   | 21.1                        | 30.8                      | 86.0                                      | 95.7 | 0.38 (0.29–0.50)           | 77.2                         | 0.28 (0.21–0.37) | 15.2                       | 0.81 (0.53–1.24) | 51.1                      | 0.27 (0.20–0.37) |
| Munich               | 1,005            | 9.1      | 44.2     | 13.0                  | 2.5                                   | 33.3                        | 41.9                      | 84.5                                      | 92.6 | 0.45 (0.38–0.53)           | 59.6                         | 0.23 (0.19–0.27) | 18.1                       | 0.76 (0.60–0.98) | 42.2                      | 0.22 (0.18–0.26) |
| Nuremberg            | 164              | 15.2     | 40.2     | 12.3                  | 1.2                                   | 39.0                        | 30.1                      | 82.5                                      | 97.9 | 0.29 (0.20–0.42)           | 70.2                         | 0.20 (0.13–0.29) | 19.1                       | 0.53 (0.28–1.00) | 51.1                      | 0.16 (0.10–0.25) |
| Ruhr Region*         | 412              | 14.6     | 39.8     | 8.0                   | 1.0                                   | 25.0                        | 29.3                      | 83.6                                      | 94.0 | 0.32 (0.25–0.41)           | 53.8                         | 0.16 (0.13–0.21) | 15.4                       | 0.64 (0.43–0.96) | 25.6                      | 0.11 (0.08–0.16) |
| Stuttgart            | 287              | 9.4      | 44.9     | 13.4                  | 0.4                                   | 33.8                        | 36.6                      | 87.7                                      | 95.0 | 0.43 (0.33–0.57)           | 72.0                         | 0.26 (0.19–0.34) | 19.0                       | 0.80 (0.52–1.22) | 39.0                      | 0.20 (0.14–0.28) |
| <b>Greece</b>        |                  |          |          |                       |                                       |                             |                           |                                           |      |                            |                              |                  |                            |                  |                           |                  |
| Athens               | 1,413            | 14.9     | 31.1     | 14.2                  | 0.8                                   | 32.3                        | 36.4                      | 57.0                                      | 93.0 | 0.42 (0.36–0.49)           | 38.3                         | 0.11 (0.10–0.13) | 14.8                       | 0.69 (0.55–0.86) | 8.6                       | 0.04 (0.03–0.05) |
| Thessaloniki         | 422              | 23.2     | 22.5     | 10.7                  | 0.2                                   | 28.2                        | 32.0                      | 51.9                                      | 88.5 | 0.34 (0.27–0.43)           | 40.5                         | 0.11 (0.08–0.14) | 15.3                       | 0.70 (0.48–1.02) | 7.6                       | 0.04 (0.02–0.06) |
| <b>Hungary</b>       |                  |          |          |                       |                                       |                             |                           |                                           |      |                            |                              |                  |                            |                  |                           |                  |
| Budapest             | 1,086            | 18.8     | 25.0     | 7.0                   | 0.4                                   | 26.5                        | 33.2                      | 61.8                                      | 92.4 | 0.40 (0.34–0.47)           | 38.6                         | 0.13 (0.11–0.16) | 12.6                       | 0.65 (0.50–0.85) | 15.5                      | 0.08 (0.06–0.10) |
| <b>Ireland</b>       |                  |          |          |                       |                                       |                             |                           |                                           |      |                            |                              |                  |                            |                  |                           |                  |
| Dublin               | 910              | 16.9     | 27.8     | 8.4                   | 5.0                                   | 31.2                        | 52.9                      | 93.2                                      | 96.6 | 0.92 (0.77–1.08)           | 95.8                         | 0.89 (0.75–1.05) | 30.7                       | 1.99 (1.62–2.44) | 81.7                      | 1.03 (0.87–1.21) |
| <b>Israel</b>        |                  |          |          |                       |                                       |                             |                           |                                           |      |                            |                              |                  |                            |                  |                           |                  |
| Tel Aviv             | 687              | 16.7     | 24.3     | 8.2                   | 5.4                                   | 50.4                        | 50.9                      | 75.9                                      | 97.3 | 0.70 (0.58–0.85)           | 86.4                         | 0.53 (0.44–0.64) | 3.3                        | 0.14 (0.08–0.24) | 5.9                       | 0.02 (0.01–0.03) |
| <b>Italy</b>         |                  |          |          |                       |                                       |                             |                           |                                           |      |                            |                              |                  |                            |                  |                           |                  |
| Bologna              | 404              | 9.7      | 49.5     | 15.8                  | 0.0                                   | 40.1                        | 43.8                      | 58.4                                      | 93.1 | 0.50 (0.40–0.64)           | 53.4                         | 0.20 (0.15–0.25) | 10.3                       | 0.41 (0.26–0.64) | 17.8                      | 0.09 (0.07–0.13) |
| Florence             | 218              | 10.1     | 55.0     | 10.6                  | 0.0                                   | 38.5                        | 32.2                      | 51.2                                      | 95.6 | 0.35 (0.26–0.48)           | 42.6                         | 0.12 (0.09–0.18) | 13.2                       | 0.46 (0.25–0.83) | 22.1                      | 0.08 (0.05–0.13) |
| Genoa                | 172              | 14.0     | 46.5     | 7.1                   | 0.0                                   | 37.4                        | 30.3                      | 29.2                                      | 94.0 | 0.33 (0.23–0.47)           | 40.0                         | 0.10 (0.07–0.16) | 4.0                        | 0.25 (0.10–0.61) | 4.0                       | 0.03 (0.01–0.07) |
| Milan                | 1,117            | 10.9     | 43.3     | 12.3                  | 1.1                                   | 38.5                        | 41.5                      | 71.3                                      | 94.7 | 0.49 (0.42–0.57)           | 36.5                         | 0.12 (0.10–0.14) | 7.1                        | 0.31 (0.23–0.43) | 12.9                      | 0.05 (0.04–0.07) |
| Naples               | 205              | 19.5     | 37.6     | 5.4                   | 0.5                                   | 34.8                        | 24.6                      | 47.6                                      | 89.4 | 0.23 (0.16–0.32)           | 31.9                         | 0.08 (0.05–0.12) | 12.8                       | 0.29 (0.14–0.63) | 17.0                      | 0.05 (0.02–0.09) |
| Palermo              | 114              | 17.5     | 42.1     | 5.4                   | 0.0                                   | 23.7                        | 30.9                      | 42.1                                      | 100. | 0.36 (0.24–0.56)           | 29.4                         | 0.08 (0.04–0.14) | 2.9                        | 0.08 (0.01–0.59) | 2.9                       | 0.01 (0.00–0.07) |
| Rome                 | 1,020            | 9.3      | 47.5     | 12.8                  | 0.4                                   | 37.6                        | 35.3                      | 66.4                                      | 93.7 | 0.36 (0.31–0.43)           | 43.0                         | 0.12 (0.10–0.15) | 9.7                        | 0.34 (0.25–0.47) | 26.5                      | 0.10 (0.08–0.13) |
| Turin                | 340              | 14.4     | 45.0     | 11.9                  | 0.3                                   | 34.4                        | 36.8                      | 80.9                                      | 93.4 | 0.38 (0.29–0.49)           | 71.9                         | 0.26 (0.20–0.33) | 29.8                       | 1.17 (0.83–1.66) | 51.2                      | 0.28 (0.21–0.37) |
| <b>Latvia</b>        |                  |          |          |                       |                                       |                             |                           |                                           |      |                            |                              |                  |                            |                  |                           |                  |
| Riga                 | 163              | 13.5     | 27.0     | 13.0                  | 0.0                                   | 21.5                        | 44.1                      | 34.9                                      | 88.7 | 0.58 (0.41–0.82)           | 53.5                         | 0.25 (0.18–0.37) | 8.5                        | 0.43 (0.21–0.90) | 8.5                       | 0.04 (0.02–0.09) |
| <b>Lebanon</b>       |                  |          |          |                       |                                       |                             |                           |                                           |      |                            |                              |                  |                            |                  |                           |                  |
| Beirut               | 111              | 20.7     | 9.9      | 12.7                  | 1.8                                   | 35.1                        | 40.0                      | 60.0                                      | 90.5 | 0.33 (0.22–0.51)           | 45.2                         | 0.11 (0.07–0.19) | 19.0                       | 0.63 (0.31–1.27) | 9.5                       | 0.04 (0.02–0.09) |
| <b>Lithuania</b>     |                  |          |          |                       |                                       |                             |                           |                                           |      |                            |                              |                  |                            |                  |                           |                  |
| Vilnius              | 190              | 26.8     | 20.5     | 9.0                   | 0.0                                   | 16.4                        | 21.2                      | 23.8                                      | 89.5 | 0.16 (0.11–0.24)           | 50.0                         | 0.09 (0.05–0.14) | 18.4                       | 0.37 (0.17–0.79) | 10.5                      | 0.02 (0.01–0.06) |
| <b>Malta</b>         |                  |          |          |                       |                                       |                             |                           |                                           |      |                            |                              |                  |                            |                  |                           |                  |
| Valetta              | 122              | 8.2      | 32.8     | 11.6                  | 6.6                                   | 34.4                        | 48.7                      | 95.5                                      | 94.8 | 0.57 (0.38–0.86)           | 89.7                         | 0.53 (0.35–0.79) | 31.0                       | 1.61 (0.98–2.64) | 72.4                      | 0.56 (0.37–0.85) |
| <b>Moldova</b>       |                  |          |          |                       |                                       |                             |                           |                                           |      |                            |                              |                  |                            |                  |                           |                  |
| Chisinau             | 373              | 44.0     | 9.9      | 7.5                   | 0.0                                   | 38.2                        | 46.2                      | 76.7                                      | 97.6 | 0.54 (0.43–0.69)           | 10.9                         | 0.03 (0.02–0.05) | 2.4                        | 0.09 (0.03–0.25) | 2.4                       | 0.01 (0.00–0.02) |

The denominator for proportions of MSM with disclosure of same sex sexual contacts, and for the proportions of MSM receiving any of the four diagnostic procedures is the number of MSM screened for STIs in the previous 12 months in the respective city. The adjusted Odds Ratio (AOR) refers to all MSM in the respective city. \*The Ruhr Region is a polycentric urban area in North Rhine-Westphalia and the largest urban area in Germany, including the cities of Dortmund, Essen, Duisburg, and Bochum; the Swiss cities Geneva and Lausanne were combined to allow the inclusion of another large Swiss metropolitan area in addition to Zurich; Sevilla & Málaga, two cities that do not form a continuous metropolitan area, were combined because the regional breakdown for Spain was not detailed enough to analyse them separately. †PrEP use includes daily and on-demand use.

Online Supplement to Doran J, *et al.* An update on the performance of STI services for gay and bisexual men across European cities—results from the 2017 European MSM Internet Survey. doi: 10.1136/sextrans-2020-054681

Correspondence: Dr Axel Jeremias Schmidt; Sigma Research, London School of Hygiene and Tropical Medicine; [axel.j.schmidt@emis-project.eu](mailto:axel.j.schmidt@emis-project.eu)

## Online Supplement. An update on the performance of STI services for gay and bisexual men across European cities—results from the 2017 European MSM Internet Survey

3/4

**Table S1 (continued):** City profiles and individual-level multivariable logistic regression (105 cities across 39 countries)

| City<br>(By Country) | Respondents<br>N | Age      |          | Diagnosed<br>HIV % | Current<br>PrEP use <sup>†</sup><br>% | >10 Sexual<br>partners<br>% | Screened<br>for STIs<br>% | Disclosure of same-sex<br>sexual contacts |      | Blood Test       | Genital Test |                  | Inspection |                  | Anal Swab |                  |
|----------------------|------------------|----------|----------|--------------------|---------------------------------------|-----------------------------|---------------------------|-------------------------------------------|------|------------------|--------------|------------------|------------|------------------|-----------|------------------|
|                      |                  | <25<br>% | >40<br>% |                    |                                       |                             |                           | %                                         | %    | AOR (95% CI)     | %            | AOR (95% CI)     | %          | AOR (95% CI)     | %         | AOR (95% CI)     |
| <b>Netherlands</b>   |                  |          |          |                    |                                       |                             |                           |                                           |      |                  |              |                  |            |                  |           |                  |
| Amsterdam            | 786              | 5.2      | 63.4     | 19.9               | 7.8                                   | 45.4                        | 58.0                      | 91.8                                      | 97.8 | 1.01 (0.84–1.22) | 92.8         | 0.87 (0.72–1.04) | 21.3       | 1.14 (0.91–1.44) | 86.3      | 1.24 (1.04–1.49) |
| Den Haag             | 124              | 8.9      | 55.6     | 18.5               | 2.4                                   | 48.4                        | 54.8                      | 88.9                                      | 95.6 | 0.80 (0.54–1.19) | 97.1         | 0.81 (0.54–1.20) | 8.8        | 0.36 (0.16–0.78) | 86.8      | 1.06 (0.72–1.57) |
| Rotterdam            | 216              | 5.1      | 56.0     | 22.3               | 4.2                                   | 44.4                        | 57.3                      | 92.4                                      | 99.2 | 1.40 (1.00–1.97) | 95.1         | 1.19 (0.86–1.65) | 11.5       | 0.83 (0.54–1.27) | 84.4      | 1.41 (1.03–1.93) |
| <b>Norway</b>        |                  |          |          |                    |                                       |                             |                           |                                           |      |                  |              |                  |            |                  |           |                  |
| Oslo                 | 1,044            | 16.2     | 36.7     | 7.0                | 8.2                                   | 25.5                        | 50.6                      | 93.1                                      | 93.2 | 0.87 (0.74–1.02) | 89.1         | 0.76 (0.64–0.89) | 8.1        | 0.51 (0.39–0.67) | 73.1      | 0.84 (0.71–0.99) |
| <b>Philippines</b>   |                  |          |          |                    |                                       |                             |                           |                                           |      |                  |              |                  |            |                  |           |                  |
| Manila               | 1,430            | 30.4     | 12.2     | 9.7                | 1.6                                   | 16.3                        | 17.2                      | 73.4                                      | 90.3 | 0.14 (0.11–0.16) | 52.3         | 0.07 (0.06–0.09) | 19.8       | 0.36 (0.27–0.49) | 15.6      | 0.03 (0.02–0.04) |
| <b>Poland</b>        |                  |          |          |                    |                                       |                             |                           |                                           |      |                  |              |                  |            |                  |           |                  |
| Gdańsk               | 201              | 30.3     | 16.9     | 6.0                | 0.0                                   | 17.9                        | 30.1                      | 42.6                                      | 86.2 | 0.29 (0.21–0.40) | 24.1         | 0.07 (0.04–0.11) | 0.0        | 0.05 (0.01–0.34) | 1.7       | 0.01 (0.00–0.04) |
| Kraków               | 341              | 28.7     | 10.3     | 8.8                | 0.6                                   | 26.4                        | 29.1                      | 29.3                                      | 95.8 | 0.34 (0.26–0.44) | 28.1         | 0.09 (0.06–0.12) | 6.3        | 0.27 (0.15–0.51) | 5.2       | 0.02 (0.01–0.04) |
| Łódź                 | 132              | 36.4     | 13.6     | 3.8                | 0.8                                   | 18.2                        | 22.9                      | 33.3                                      | 96.7 | 0.29 (0.20–0.44) | 20.0         | 0.06 (0.03–0.11) | 6.7        | 0.14 (0.04–0.58) | 16.7      | 0.04 (0.01–0.09) |
| Poznań               | 225              | 28.0     | 13.8     | 6.7                | 0.4                                   | 22.9                        | 27.6                      | 30.0                                      | 91.7 | 0.32 (0.23–0.44) | 26.7         | 0.07 (0.04–0.11) | 1.7        | 0.20 (0.08–0.50) | 6.7       | 0.02 (0.01–0.05) |
| Warsaw               | 939              | 19.2     | 17.1     | 12.8               | 1.0                                   | 29.8                        | 37.3                      | 58.7                                      | 96.2 | 0.45 (0.38–0.53) | 37.8         | 0.11 (0.09–0.13) | 3.8        | 0.18 (0.11–0.28) | 7.9       | 0.03 (0.02–0.04) |
| Wrocław              | 282              | 14.9     | 11.3     | 7.8                | 1.8                                   | 20.6                        | 35.8                      | 54.0                                      | 95.9 | 0.47 (0.36–0.62) | 24.5         | 0.09 (0.06–0.13) | 5.1        | 0.21 (0.10–0.45) | 6.1       | 0.03 (0.01–0.05) |
| <b>Portugal</b>      |                  |          |          |                    |                                       |                             |                           |                                           |      |                  |              |                  |            |                  |           |                  |
| Lisbon               | 873              | 14.9     | 33.6     | 17.6               | 2.5                                   | 40.5                        | 46.5                      | 73.7                                      | 90.1 | 0.54 (0.46–0.65) | 56.1         | 0.25 (0.21–0.30) | 9.2        | 0.45 (0.34–0.61) | 21.7      | 0.11 (0.09–0.14) |
| Porto                | 279              | 21.1     | 26.9     | 14.4               | 1.4                                   | 32.6                        | 41.5                      | 63.8                                      | 90.9 | 0.40 (0.30–0.53) | 58.2         | 0.19 (0.14–0.26) | 5.5        | 0.22 (0.11–0.45) | 14.5      | 0.04 (0.03–0.08) |
| <b>Romania</b>       |                  |          |          |                    |                                       |                             |                           |                                           |      |                  |              |                  |            |                  |           |                  |
| Bucharest            | 628              | 28.8     | 18.9     | 8.8                | 0.3                                   | 25.7                        | 42.3                      | 29.1                                      | 89.8 | 0.48 (0.39–0.58) | 42.6         | 0.16 (0.13–0.20) | 4.3        | 0.22 (0.13–0.37) | 5.9       | 0.03 (0.02–0.04) |
| <b>Russia</b>        |                  |          |          |                    |                                       |                             |                           |                                           |      |                  |              |                  |            |                  |           |                  |
| Krasnodar            | 122              | 34.4     | 12.3     | 9.0                | 0.0                                   | 29.5                        | 40.8                      | 14.3                                      | 77.6 | 0.40 (0.27–0.60) | 73.5         | 0.32 (0.22–0.49) | 18.4       | 0.80 (0.42–1.53) | 20.4      | 0.08 (0.04–0.15) |
| Moscow               | 2,031            | 20.3     | 15.6     | 18.2               | 1.0                                   | 29.4                        | 44.5                      | 20.8                                      | 88.1 | 0.61 (0.54–0.70) | 61.3         | 0.32 (0.28–0.36) | 16.2       | 0.78 (0.65–0.95) | 18.0      | 0.08 (0.06–0.09) |
| Novosibirsk          | 109              | 32.1     | 13.8     | 10.2               | 0.9                                   | 19.3                        | 34.3                      | 16.7                                      | 97.3 | 0.39 (0.26–0.60) | 83.8         | 0.35 (0.23–0.54) | 21.6       | 0.77 (0.38–1.56) | 21.6      | 0.07 (0.03–0.14) |
| Samara               | 123              | 26.0     | 15.4     | 14.6               | 1.6                                   | 20.3                        | 34.2                      | 7.4                                       | 85.4 | 0.38 (0.26–0.58) | 63.4         | 0.24 (0.16–0.37) | 17.1       | 0.71 (0.36–1.38) | 9.8       | 0.03 (0.01–0.08) |
| St. Petersburg       | 964              | 25.8     | 14.3     | 15.0               | 0.2                                   | 24.8                        | 40.4                      | 24.5                                      | 85.1 | 0.56 (0.47–0.66) | 67.3         | 0.37 (0.32–0.44) | 19.9       | 1.08 (0.86–1.37) | 19.9      | 0.09 (0.07–0.11) |
| Yekaterinburg        | 173              | 13.9     | 15.6     | 13.0               | 0.0                                   | 18.5                        | 40.2                      | 18.0                                      | 88.2 | 0.54 (0.38–0.76) | 69.1         | 0.39 (0.27–0.55) | 17.6       | 0.95 (0.56–1.61) | 19.1      | 0.09 (0.05–0.16) |
| <b>Serbia</b>        |                  |          |          |                    |                                       |                             |                           |                                           |      |                  |              |                  |            |                  |           |                  |
| Belgrade             | 437              | 19.0     | 22.0     | 8.5                | 0.5                                   | 21.5                        | 18.8                      | 47.7                                      | 87.3 | 0.17 (0.13–0.22) | 36.7         | 0.06 (0.05–0.09) | 13.9       | 0.36 (0.22–0.59) | 8.9       | 0.03 (0.02–0.05) |
| <b>Slovakia</b>      |                  |          |          |                    |                                       |                             |                           |                                           |      |                  |              |                  |            |                  |           |                  |
| Bratislava           | 410              | 17.1     | 13.9     | 4.6                | 0.7                                   | 15.9                        | 26.2                      | 47.2                                      | 94.1 | 0.26 (0.21–0.34) | 44.1         | 0.12 (0.09–0.16) | 14.7       | 0.43 (0.26–0.71) | 16.7      | 0.06 (0.04–0.09) |
| <b>Slovenia</b>      |                  |          |          |                    |                                       |                             |                           |                                           |      |                  |              |                  |            |                  |           |                  |
| Ljubljana            | 269              | 18.2     | 26.4     | 7.5                | 1.9                                   | 19.7                        | 47.5                      | 80.3                                      | 95.2 | 0.75 (0.57–0.99) | 33.3         | 0.14 (0.10–0.20) | 7.1        | 0.48 (0.28–0.84) | 48.4      | 0.40 (0.29–0.54) |
| <b>Spain</b>         |                  |          |          |                    |                                       |                             |                           |                                           |      |                  |              |                  |            |                  |           |                  |
| Barcelona            | 1,571            | 13.9     | 34.6     | 18.9               | 4.3                                   | 44.0                        | 50.0                      | 79.5                                      | 94.0 | 0.75 (0.65–0.87) | 68.2         | 0.39 (0.34–0.45) | 16.5       | 0.80 (0.66–0.97) | 41.4      | 0.26 (0.22–0.3)  |
| Madrid               | 2,304            | 18.5     | 28.1     | 14.0               | 1.2                                   | 38.6                        | 45.2                      | 67.3                                      | 96.2 | 0.70 (0.61–0.79) | 54.6         | 0.25 (0.22–0.29) | 11.3       | 0.62 (0.51–0.75) | 21.2      | 0.11 (0.10–0.13) |
| Sevilla & Málaga*    | 400              | 25.5     | 27.8     | 14.1               | 0.0                                   | 31.3                        | 39.9                      | 65.6                                      | 96.8 | 0.63 (0.50–0.79) | 56.5         | 0.28 (0.22–0.36) | 12.3       | 0.65 (0.44–0.96) | 23.4      | 0.14 (0.10–0.19) |
| Valencia             | 422              | 23.0     | 29.4     | 11.2               | 1.7                                   | 34.0                        | 38.5                      | 65.7                                      | 96.8 | 0.54 (0.43–0.68) | 42.9         | 0.15 (0.12–0.20) | 15.4       | 0.65 (0.44–0.96) | 18.6      | 0.09 (0.06–0.13) |
| Zaragoza             | 134              | 20.7     | 34.3     | 5.2                | 1.5                                   | 30.6                        | 26.7                      | 50.0                                      | 97.1 | 0.36 (0.24–0.53) | 54.3         | 0.20 (0.13–0.30) | 2.9        | 0.20 (0.06–0.63) | 5.7       | 0.03 (0.01–0.07) |

The denominator for proportions of MSM with disclosure of same sex sexual contacts, and for the proportions of MSM receiving any of the four diagnostic procedures is the number of MSM screened for STIs in the previous 12 months in the respective city. The adjusted Odds Ratio (AOR) refers to all MSM in the respective city. \*The Ruhr Region is a polycentric urban area in North Rhine-Westphalia and the largest urban area in Germany, including the cities of Dortmund, Essen, Duisburg, and Bochum; the Swiss cities Geneva and Lausanne were combined to allow the inclusion of another large Swiss metropolitan area in addition to Zurich; Sevilla & Málaga, two cities that do not form a continuous metropolitan area, were combined because the regional breakdown for Spain was not detailed enough to analyse them separately. †PrEP use includes daily and on-demand use.

Online Supplement to Doran J, *et al.* An update on the performance of STI services for gay and bisexual men across European cities—results from the 2017 European MSM Internet Survey. doi: 10.1136/sextrans-2020-054681

Correspondence: Dr Axel Jeremias Schmidt; Sigma Research, London School of Hygiene and Tropical Medicine; [axel.j.schmidt@emis-project.eu](mailto:axel.j.schmidt@emis-project.eu)

## Online Supplement. An update on the performance of STI services for gay and bisexual men across European cities—results from the 2017 European MSM Internet Survey

4/4

**Table S1 (continued):** City profiles and individual-level multivariable logistic regression (105 cities across 39 countries)

| City<br>(By Country)                | Respondents<br>N | Age      |          | Diagnosed<br>HIV<br>% | Current<br>PrEP use <sup>†</sup><br>% | >10 Sexual<br>partners<br>% | Screened<br>for STIs<br>% | Disclosure of same-sex<br>sexual contacts |      | Blood Test          |      | Genital Test      |      | Inspection       |      | Anal Swab        |  |
|-------------------------------------|------------------|----------|----------|-----------------------|---------------------------------------|-----------------------------|---------------------------|-------------------------------------------|------|---------------------|------|-------------------|------|------------------|------|------------------|--|
|                                     |                  | <25<br>% | >40<br>% |                       |                                       |                             |                           | %                                         | %    | AOR (95% CI)        | %    | AOR (95% CI)      | %    | AOR (95% CI)     | %    | AOR (95% CI)     |  |
| <b>Sweden</b>                       |                  |          |          |                       |                                       |                             |                           |                                           |      |                     |      |                   |      |                  |      |                  |  |
| Gothenburg                          | 362              | 9.1      | 50.0     | 2.8                   | 1.1                                   | 21.3                        | 33.2                      | 79.7                                      | 86.3 | 0.38 (0.29–0.48)    | 85.5 | 0.37 (0.29–0.48)  | 16.2 | 0.67 (0.43–1.04) | 55.6 | 0.33 (0.25–0.44) |  |
| Stockholm                           | 1,263            | 6.2      | 59.8     | 9.7                   | 1.4                                   | 23.6                        | 43.4                      | 88.9                                      | 94.5 | 0.66 (0.56–0.76)    | 91.9 | 0.61 (0.52–0.71)  | 24.8 | 1.41 (1.15–1.73) | 73.3 | 0.73 (0.63–0.85) |  |
| <b>Switzerland</b>                  |                  |          |          |                       |                                       |                             |                           |                                           |      |                     |      |                   |      |                  |      |                  |  |
| Geneva-Lausanne*                    | 304              | 14.8     | 43.8     | 11.2                  | 4.3                                   | 36.8                        | 51.8                      | 87.4                                      | 95.5 | 0.81 (0.62–1.05)    | 75.5 | 0.49 (0.38–0.64)  | 9.7  | 0.49 (0.31–0.79) | 46.5 | 0.32 (0.24–0.42) |  |
| Zurich                              | 565              | 5.3      | 49.9     | 14.7                  | 7.3                                   | 42.1                        | 48.5                      | 89.8                                      | 93.3 | 0.66 (0.53–0.81)    | 77.5 | 0.42 (0.34–0.52)  | 16.1 | 0.69 (0.51–0.94) | 47.9 | 0.32 (0.26–0.40) |  |
| <b>Turkey</b>                       |                  |          |          |                       |                                       |                             |                           |                                           |      |                     |      |                   |      |                  |      |                  |  |
| Ankara                              | 243              | 39.5     | 8.2      | 9.1                   | 0.4                                   | 32.4                        | 30.6                      | 19.8                                      | 95.8 | 0.29 (0.21–0.39)    | 39.4 | 0.09 (0.06–0.13)  | 4.2  | 0.13 (0.05–0.36) | 5.6  | 0.02 (0.01–0.04) |  |
| Istanbul                            | 858              | 28.2     | 16.1     | 12.8                  | 1.2                                   | 38.4                        | 31.3                      | 35.6                                      | 94.6 | 0.25 (0.21–0.30)    | 49.6 | 0.10 (0.08–0.12)  | 9.7  | 0.28 (0.19–0.40) | 10.5 | 0.03 (0.02–0.04) |  |
| Izmir                               | 162              | 38.3     | 12.3     | 8.7                   | 1.2                                   | 31.1                        | 27.1                      | 28.0                                      | 88.1 | 0.20 (0.13–0.29)    | 38.1 | 0.07 (0.05–0.12)  | 9.5  | 0.20 (0.07–0.55) | 4.8  | 0.01 (0.00–0.04) |  |
| <b>United Kingdom</b>               |                  |          |          |                       |                                       |                             |                           |                                           |      |                     |      |                   |      |                  |      |                  |  |
| Birmingham                          | 256              | 20.7     | 37.1     | 10.2                  | 3.9                                   | 27.0                        | 49.6                      | 89.7                                      | 93.6 | 0.75 (0.57–0.99)    | 96.0 | 0.76 (0.58–1.01)  | 20.0 | 1.28 (0.87–1.88) | 77.6 | 0.81 (0.61–1.07) |  |
| Brighton                            | 179              | 14.5     | 55.9     | 19.8                  | 13.0                                  | 35.8                        | 53.4                      | 98.2                                      | 89.4 | 0.75 (0.53–1.06)    | 97.9 | 0.97 (0.68–1.38)  | 17.0 | 0.87 (0.54–1.40) | 83.0 | 1.09 (0.77–1.54) |  |
| Bristol                             | 172              | 20.3     | 32.6     | 7.6                   | 7.6                                   | 26.2                        | 55.6                      | 89.0                                      | 91.6 | 0.87 (0.62–1.22)    | 94.7 | 0.94 (0.67–1.33)  | 16.8 | 1.00 (0.61–1.64) | 76.8 | 0.93 (0.66–1.31) |  |
| Cardiff                             | 111              | 21.6     | 35.1     | 8.1                   | 12.6                                  | 36.9                        | 48.6                      | 93.8                                      | 92.5 | 0.58 (0.37–0.88)    | 96.2 | 0.68 (0.44–1.04)  | 18.9 | 0.78 (0.42–1.47) | 84.9 | 0.80 (0.52–1.23) |  |
| Edinburgh                           | 213              | 21.1     | 33.3     | 9.4                   | 9.9                                   | 36.2                        | 49.8                      | 95.8                                      | 99.0 | 0.74 (0.54–1.01)    | 95.1 | 0.63 (0.46–0.86)  | 11.8 | 0.55 (0.32–0.94) | 91.2 | 0.98 (0.71–1.34) |  |
| Glasgow                             | 230              | 17.4     | 28.3     | 4.8                   | 10.9                                  | 28.7                        | 49.8                      | 93.8                                      | 98.2 | 0.76 (0.56–1.03)    | 95.5 | 0.71 (0.53–0.96)  | 11.6 | 0.56 (0.33–0.95) | 75.0 | 0.68 (0.50–0.92) |  |
| Leeds                               | 182              | 18.1     | 35.2     | 8.3                   | 5.0                                   | 22.0                        | 46.1                      | 88.1                                      | 93.9 | 0.80 (0.58–1.11)    | 92.7 | 0.78 (0.56–1.09)  | 28.0 | 2.10 (1.41–3.14) | 74.4 | 0.87 (0.62–1.21) |  |
| Liverpool                           | 119              | 26.1     | 31.9     | 6.7                   | 5.0                                   | 24.4                        | 45.7                      | 90.2                                      | 92.5 | 0.62 (0.42–0.93)    | 98.1 | 0.68 (0.46–1.02)  | 43.4 | 2.73 (1.73–4.33) | 75.5 | 0.78 (0.52–1.18) |  |
| London                              | 2,627            | 10.0     | 46.1     | 14.7                  | 13.1                                  | 40.4                        | 59.1                      | 93.9                                      | 96.1 | 1.00 (Ref.)         | 96.0 | 1.00 (Ref.)       | 18.2 | 1.00 (Ref.)      | 79.5 | 1.00 (Ref.)      |  |
| Manchester                          | 398              | 18.6     | 34.2     | 12.8                  | 8.6                                   | 34.2                        | 50.1                      | 91.2                                      | 92.8 | 0.83 (0.65–1.05)    | 93.8 | 0.84 (0.66–1.07)  | 20.5 | 1.47 (1.10–1.97) | 72.3 | 0.81 (0.64–1.02) |  |
| <b>Ukraine</b>                      |                  |          |          |                       |                                       |                             |                           |                                           |      |                     |      |                   |      |                  |      |                  |  |
| Kiev                                | 471              | 31.8     | 14.9     | 15.3                  | 0.4                                   | 24.9                        | 47.4                      | 45.2                                      | 82.6 | 0.54 (0.43–0.67)    | 36.2 | 0.16 (0.12–0.20)  | 12.8 | 0.65 (0.45–0.94) | 10.1 | 0.05 (0.03–0.07) |  |
| <b>Control Variables</b>            |                  |          |          |                       |                                       |                             |                           | <b>Blood Test</b>                         |      | <b>Genital Test</b> |      | <b>Inspection</b> |      | <b>Anal Swab</b> |      |                  |  |
|                                     |                  |          |          |                       |                                       |                             |                           | AOR (95% CI)                              |      | AOR (95% CI)        |      | AOR (95% CI)      |      | AOR (95% CI)     |      |                  |  |
| <b>Age group</b>                    |                  |          |          |                       |                                       |                             |                           |                                           |      |                     |      |                   |      |                  |      |                  |  |
| <25                                 |                  |          |          |                       |                                       |                             |                           | 0.72 (0.69–0.76)                          |      | 0.78 (0.74–0.83)    |      | 0.86 (0.78–0.95)  |      | 0.93 (0.86–1.00) |      |                  |  |
| 25–39                               |                  |          |          |                       |                                       |                             |                           | 1.00 (Ref.)                               |      | 1.00 (Ref.)         |      | 1.00 (Ref.)       |      | 1.00 (Ref.)      |      |                  |  |
| 40+                                 |                  |          |          |                       |                                       |                             |                           | 0.66 (0.63–0.69)                          |      | 0.68 (0.65–0.71)    |      | 0.88 (0.83–0.95)  |      | 0.62 (0.59–0.65) |      |                  |  |
| <b>Proxy for clinical follow-up</b> |                  |          |          |                       |                                       |                             |                           |                                           |      |                     |      |                   |      |                  |      |                  |  |
| None                                |                  |          |          |                       |                                       |                             |                           | 1.00 (Ref.)                               |      | 1.00 (Ref.)         |      | 1.00 (Ref.)       |      | 1.00 (Ref.)      |      |                  |  |
| HIV diagnosis                       |                  |          |          |                       |                                       |                             |                           | 3.98 (3.73–4.24)                          |      | 3.45 (3.26–3.66)    |      | 2.61 (2.42–2.81)  |      | 3.11 (2.91–3.31) |      |                  |  |
| Current PrEP use <sup>†</sup>       |                  |          |          |                       |                                       |                             |                           | 7.75 (6.60–9.11)                          |      | 8.15 (7.09–9.37)    |      | 3.19 (2.86–3.55)  |      | 8.71 (7.78–9.76) |      |                  |  |
| <b>Number of sexual partners</b>    |                  |          |          |                       |                                       |                             |                           |                                           |      |                     |      |                   |      |                  |      |                  |  |
| None                                |                  |          |          |                       |                                       |                             |                           | 1.00 (Ref.)                               |      | 1.00 (Ref.)         |      | 1.00 (Ref.)       |      | 1.00 (Ref.)      |      |                  |  |
| 1                                   |                  |          |          |                       |                                       |                             |                           | 1.15 (1.06–1.25)                          |      | 1.00 (0.90–1.10)    |      | 0.94 (0.79–1.11)  |      | 0.94 (0.82–1.07) |      |                  |  |
| 2–5                                 |                  |          |          |                       |                                       |                             |                           | 2.05 (1.90–2.21)                          |      | 1.88 (1.73–2.05)    |      | 1.33 (1.15–1.53)  |      | 1.85 (1.65–2.08) |      |                  |  |
| 6–10                                |                  |          |          |                       |                                       |                             |                           | 3.17 (2.93–3.44)                          |      | 2.78 (2.54–3.04)    |      | 1.58 (1.36–1.83)  |      | 2.90 (2.58–3.25) |      |                  |  |
| >10                                 |                  |          |          |                       |                                       |                             |                           | 5.24 (4.86–5.65)                          |      | 4.40 (4.05–4.79)    |      | 2.56 (2.23–2.93)  |      | 4.55 (4.08–5.08) |      |                  |  |
| <b>Discrepant answers</b>           |                  |          |          |                       |                                       |                             |                           | (p=0.489)                                 |      | 1.09 (1.02–1.16)    |      | 1.23 (1.12–1.35)  |      | (p=0.171)        |      |                  |  |

The denominator for proportions of MSM with disclosure of same sex sexual contacts, and for the proportions of MSM receiving any of the four diagnostic procedures is the number of MSM screened for STIs in the previous 12 months in the respective city. The adjusted Odds Ratio (AOR) refers to all MSM in the respective city. \*The Ruhr Region is a polycentric urban area in North Rhine-Westphalia and the largest urban area in Germany, including the cities of Dortmund, Essen, Duisburg, and Bochum; the Swiss cities Geneva and Lausanne were combined to allow the inclusion of another large Swiss metropolitan area in addition to Zurich; Sevilla & Málaga, two cities that do not form a continuous metropolitan area, were combined because the regional breakdown for Spain was not detailed enough to analyse them separately. †PrEP use includes daily and on-demand use.

**Online Supplement to** Doran J, *et al.* An update on the performance of STI services for gay and bisexual men across European cities—results from the 2017 European MSM Internet Survey. doi: 10.1136/sextrans-2020-054681

**Correspondence:** Dr Axel Jeremias Schmidt; Sigma Research, London School of Hygiene and Tropical Medicine; [axel.j.schmidt@emis-project.eu](mailto:axel.j.schmidt@emis-project.eu)
